# Supplementary material for: Exploring the role of ionic liquids to tune the polymorphic outcome of organic compounds
Source: PubMed Central journal article supplement (PMC5887107; doi:10.1039/c7sc04353h), 2017-12-22
Supplement: SC-009-C7SC04353H-s001.pdf [file SC-009-C7SC04353H-s001.pdf]

## Exploring the role of ionic liquids to tune the polymorphic outcome of organic compounds

Qingying Zeng<sup>†‡</sup>, Arijit Mukherjee<sup>†‡</sup>, Peter Muller<sup>^</sup>, Robin D. Rogers<sup>≠</sup>, Allan S. Myerson<sup>†\*</sup>

<sup>†</sup> Novartis-MIT Center for Continuous Manufacturing and Department of Chemical Engineering  
Massachusetts Institute of Technology, 77 Massachusetts Avenue, Cambridge, Massachusetts  
02139 (USA)

<sup>≠</sup> Department of Chemistry, McGill University 801 Sherbrooke St. W., Montreal, QC H3A 0B8  
(Canada)

<sup>^</sup>Department of Chemistry, Massachusetts Institute of Technology, 6-331, 77 Massachusetts  
Avenue, Cambridge, Massachusetts 02139, United States

<sup>‡</sup> These authors contributed equally to the manuscript.

\*Corresponding author email: myerson@mit.edu

## Supporting Information

### Contents

| Index | Title                                                                                                                             | Page number |
|-------|-----------------------------------------------------------------------------------------------------------------------------------|-------------|
| S1    | Comparison of Tetrolic acid polymorphs with other similar systems                                                                 | 2           |
| S2    | Crystallographic information table for [Emim][H(TA) <sub>2</sub> ]                                                                | 2           |
| S3    | ORTEP diagram for [Emim][H(TA) <sub>2</sub> ]                                                                                     | 3           |
| S4    | Attachment energy calculations on $\alpha$ -dimer of TA                                                                           | 3           |
| S5    | Raman spectra of Isonicotinamide (INA) catemer (peak at 1003cm <sup>-1</sup> ) form and dimer form (peak at 995cm <sup>-1</sup> ) | 4           |
| S6    | Simultaneous examination of Solid and IL Raman spectra (IL in the example: [Emim][BF <sub>4</sub> ])                              | 4           |
| S7    | NMR spectra showing INA monomers in [Emim][NTf <sub>2</sub> ], [Emim][BF <sub>4</sub> ]                                           | 5           |
| S8    | Water content calculation in the used ILs                                                                                         | 6           |

## S1. Crystal structures of two tetrolic acid polymorphs

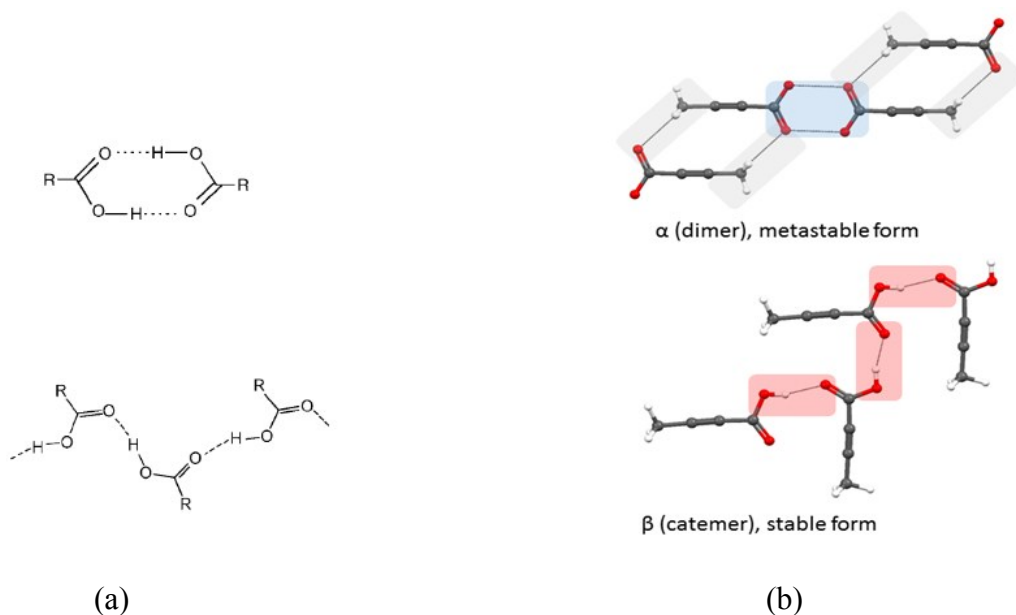

**Figure S1.** (a) Possible synthons in the polymorphs of tetrolic acid, (b)  $\alpha$  form shows the presence of carboxylic acid dimer whereas the  $\beta$  form sustains through the catemer synthon.

## S2. Crystallographic details for [Emim][H(TA)<sub>2</sub>]

|                                            |                                                               |
|--------------------------------------------|---------------------------------------------------------------|
| Name                                       | 1-Ethyl-3-methylimidazolium tetrolate                         |
| Formula                                    | C <sub>14</sub> H <sub>18</sub> N <sub>2</sub> O <sub>4</sub> |
| Molecular weight                           | 278.30                                                        |
| Crystal system                             | triclinic                                                     |
| Space group                                | P -1                                                          |
| a(Å)                                       | 6.746(3)                                                      |
| b(Å)                                       | 7.246(3)                                                      |
| c(Å)                                       | 7.434(3)                                                      |
| $\alpha$ (°)                               | 77.801(7)                                                     |
| $\beta$ (°)                                | 83.650(8)                                                     |
| $\gamma$ (°)                               | 88.409(7)                                                     |
| Volume (Å <sup>3</sup> )                   | 353.0(2)                                                      |
| Z                                          | 1                                                             |
| $\rho_{\text{calc}}$ (g/cm <sup>3</sup> )  | 1.309                                                         |
| F(000)                                     | 148                                                           |
| Crystal size (mm)                          | 0.11 x 0.22 x 0.41                                            |
| $\mu$ (Mo K $\alpha$ ) (mm <sup>-1</sup> ) | 0.097                                                         |
| Temp (K)                                   | 100(2)                                                        |
| $\Theta$ range for data collection         | 2.8, 33.6                                                     |
| R <sub>1</sub>                             | 0.0624                                                        |
| wR <sub>2</sub>                            | 0.2064                                                        |
| Goodness of fit                            | 1.08                                                          |

|                  |         |
|------------------|---------|
| Reflns collected | 2771    |
| Unique reflns    | 2771    |
| Observed reflns  | 2101    |
| CCDC no.         | 1577981 |

### S3. ORTEP diagram of [Emim][H(TA)<sub>2</sub>]

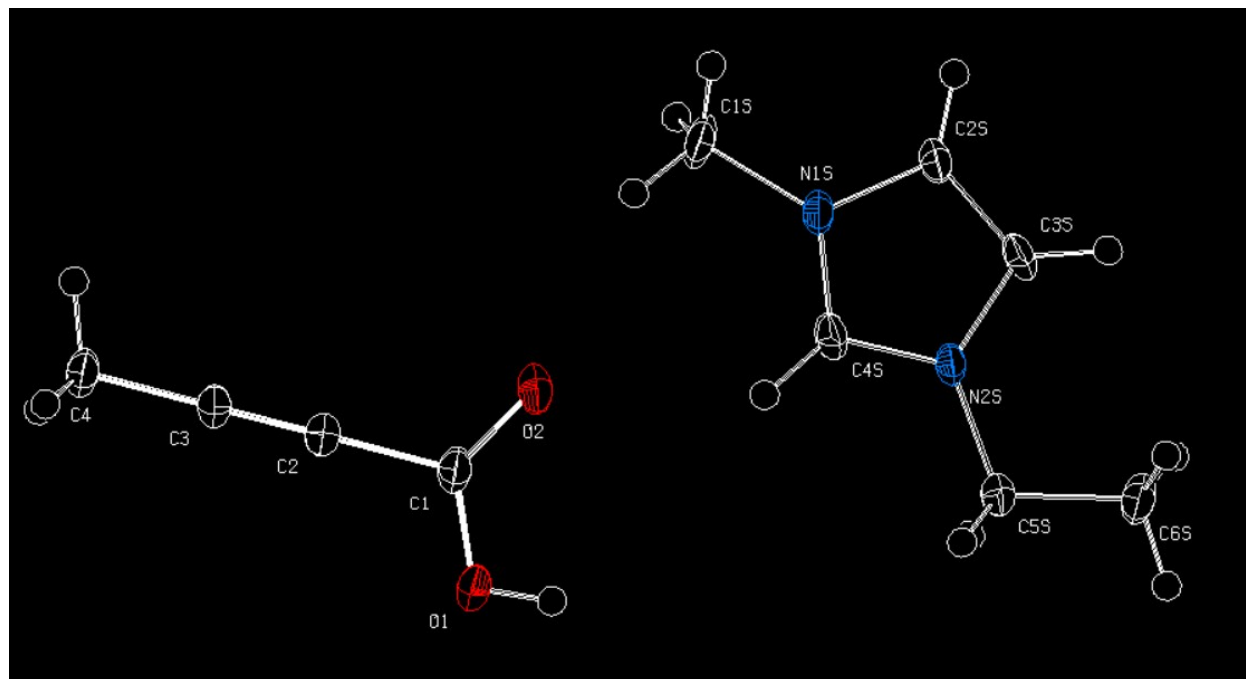

### S4. Attachment energy calculations on $\alpha$ -dimer of TA

Attachment energies were calculated in the Morphology module of the Materials Studio. The attachment energies for the seven unique faces of the  $\alpha$ -dimer of TA are given in the following table.

| Faces   | $E_{att}$ (Kcal/mol) | Eatt (vdW) | Eatt(electrostatic) |
|---------|----------------------|------------|---------------------|
| (100)   | -18.18               | -14.29     | -3.89               |
| (010)   | -14.76               | -13.19     | -1.57               |
| (01-1)  | -25.76               | -10.36     | -15.41              |
| (001)   | -8.99                | -8.5       | -0.49               |
| (1-11)  | -29.35               | -13.92     | -15.42              |
| (110)   | -16.94               | -16.44     | -0.50               |
| (1-1-1) | -24.30               | -9.40      | -14.90              |

**S5. Raman spectra of Isonicotinamide (INA) catemer (peak at 1003cm<sup>-1</sup>) form and dimer form (peak at 995cm<sup>-1</sup>)**

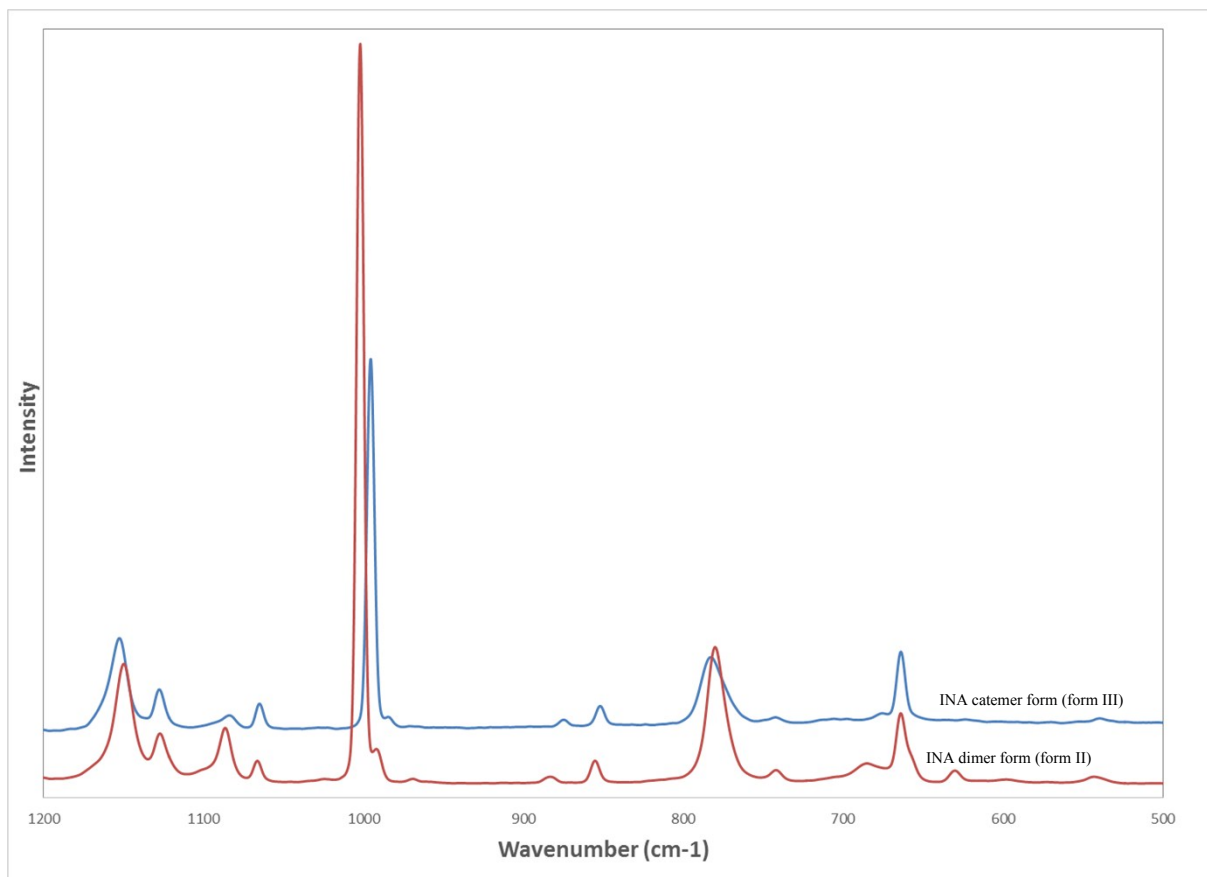

**S6. Simultaneous examination of Solid and IL Raman spectra (IL in the example: [Emim][BF<sub>4</sub>])**

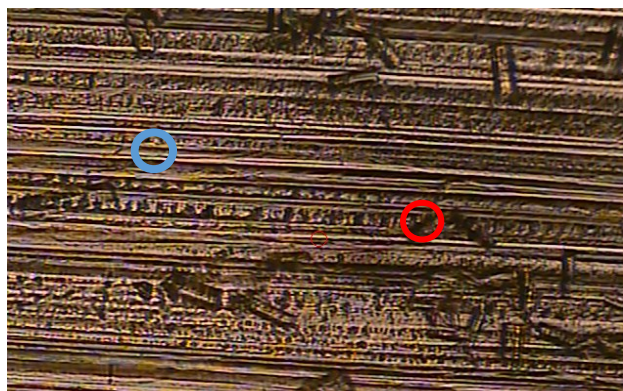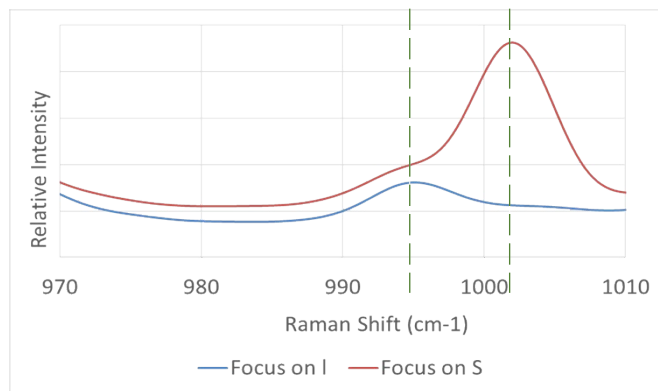

**S7. NMR spectra showing INA monomers in [Emim][NTf<sub>2</sub>], [Emim][BF<sub>4</sub>]**

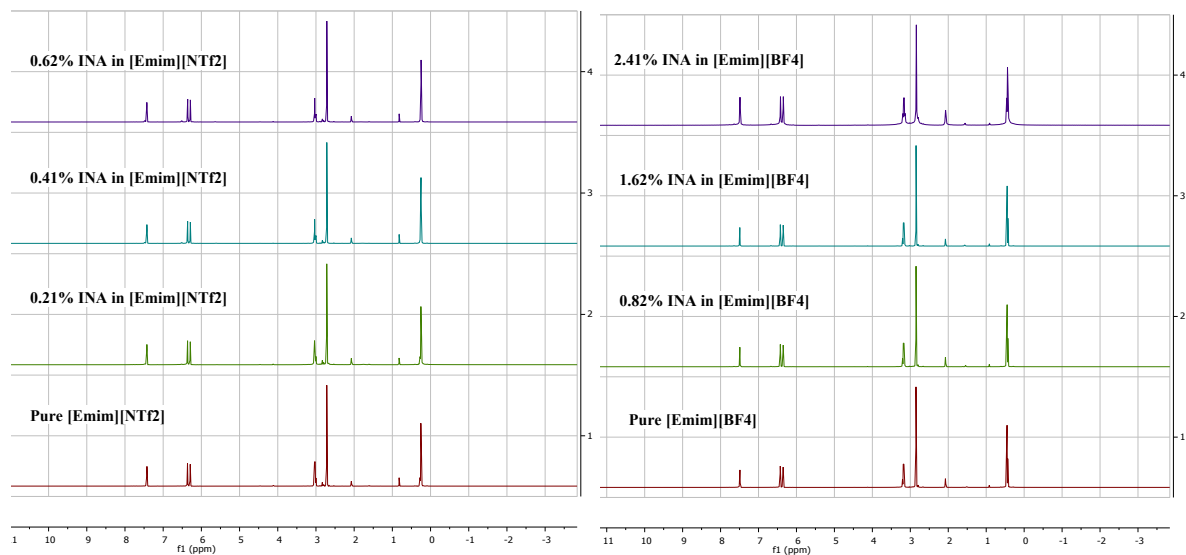

$^1\text{H}$  chemical shifts of [Emim] in ppm

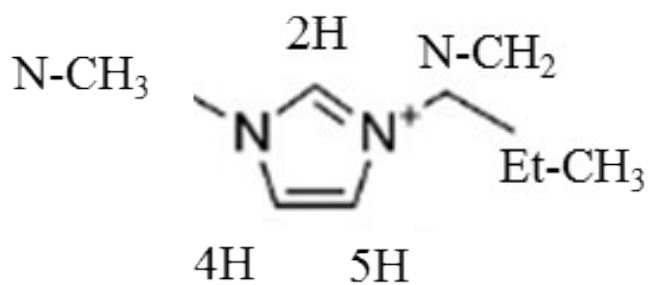

| Sample                    | 2H   | 4H   | 5H   | N-CH <sub>3</sub> | N-CH <sub>2</sub> | Et-CH <sub>3</sub> |
|---------------------------|------|------|------|-------------------|-------------------|--------------------|
| [Emim][NTf <sub>2</sub> ] | 7.49 | 6.43 | 6.35 | 3.19              | 2.85              | 0.45               |
| Low                       | 7.49 | 6.43 | 6.35 | 3.19              | 2.85              | 0.45               |
| high                      | 7.49 | 6.43 | 6.35 | 3.18              | 2.85              | 0.45               |
| Saturated                 | 7.49 | 6.42 | 6.35 | 3.18              | 2.84              | 0.44               |
| [Emim][BF <sub>4</sub> ]  | 7.43 | 6.36 | 6.29 | 3.04              | 2.72              | 0.25               |
| low                       | 7.43 | 6.36 | 6.29 | 3.04              | 2.72              | 0.25               |
| high                      | 7.43 | 6.36 | 6.29 | 3.03              | 2.72              | 0.25               |
| Saturated                 | 7.43 | 6.36 | 6.29 | 3.03              | 2.72              | 0.25               |

### S8. Water content calculation in the used ILs

| Ionic Liquid Name           | Measurement 1 (ppm) | Measurement 2 (ppm) | Measurement 3 (ppm) | Water Content (ppm) | Water Content (%) |
|-----------------------------|---------------------|---------------------|---------------------|---------------------|-------------------|
| [Emim][NTf <sub>2</sub> ]   | 260                 | 262                 | 282                 | 268±12              | 0.03              |
| [Emim][OAc]                 | 4524                | 4405                | 4261                | 4397±132            | 0.44              |
| [Emim][N(CN) <sub>2</sub> ] | 1595                | 1711                | 1793                | 1700±99             | 0.17              |
| [OHEmim][BF <sub>4</sub> ]  | 1740                | 1732                | 1853                | 1775±68             | 0.18              |
| [OHEmim][NTf <sub>2</sub> ] | 268                 | 293                 | 284                 | 282±13              | 0.03              |
| [Emim][BF <sub>4</sub> ]    | 1030                | 1014                | 1011                | 1018±10             | 0.1               |
